# Supplementary material for: Characterization of long noncoding RNA and messenger RNA signatures in melanoma tumorigenesis and metastasis
Source: PLoS One. 2017 Feb 22;12(2):e0172498. doi: 10.1371/journal.pone.0172498 (PMC5321451; doi:10.1371/journal.pone.0172498)
Supplement: S14 Table — (XLSX) [file pone.0172498.s015.xlsx]

## Sheet: PMN
Table S14 Partial list of mRNAs interacting with ENST00000565315 (RP11-532F12.5), sorted by MinEnergy											Table S14 Partial list of mRNAs interacting with ENST00000565315 (RP11-532F12.5), sorted by SumEnergy
				MinEnergy											MinEnergy
Rank	Ensemble ID	Name	Position (hg19)	MinEnergy	BS(query)	BS(target)	location	SumEnergy			Rank	Ensemble ID	Name	Position (hg19)	MinEnergy	BS(query)	BS(target)	location	SumEnergy
1	ENST00000330553	KRT79	chr12:53215232-53228079	-28.4	369-419	1508-1558	CDS	-191.2			1	ENST00000265843	EXPH5	chr11:108376159-108464374	-17.8	271-320	3427-3476	CDS	-1180.1
2	ENST00000251808	GRHL2	chr8:102504661-102681954	-26.6	290-337	531-578	CDS	-447.6			2	ENST00000377122	NEBL	chr10:21068903-21186531	-20.5	406-461	1930-1985	CDS	-985.9
3	ENST00000244360	RNF39	chr6:30038044-30043664	-26.6	12055	484-535	CDS	-196.3			3	ENST00000398309	DLG2	chr11:83166056-84634633	-21.1	369-416	3679-3726	UTR3	-837.1
4	ENST00000341809	KRT77	chr12:53083411-53097247	-26.3	370-417	274-321	CDS	-417			4	ENST00000221347	FCGBP	chr19:40353964-40440533	-20.5	336-383	14751-14798	CDS	-787.5
5	ENST00000358945	SCNN1A	chr12:6456012-6484390	-23.5	538-585	222-269	UTR5	-300.8			5	ENST00000263707	TFCP2L1	chr2:121974164-122042783	-21.4	222-277	1072-1127	CDS	-748
6	ENST00000473183	ESRP2	chr16:68263030-68270487	-23.2	523-576	1504-1557	CDS	-317.1			6	ENST00000281282	CGNL1	chr15:57668704-57842925	-20.3	483-537	736-790	CDS	-718.1
7	ENST00000373366	GJB3	chr1:35246791-35251965	-22.2	30-79	687-736	CDS	-150.6			7	ENST00000295092	FAM84A	chr2:14772811-14780170	-21.7	273-328	1018-1073	CDS	-675.5
8	ENST00000295092	FAM84A	chr2:14772811-14780170	-21.7	273-328	1018-1073	CDS	-675.5			8	ENST00000433979	PIK3C2G	chr12:18414475-18801348	-12.8	491-538	1079-1126	CDS	-611
9	ENST00000439028	S1PR5	chr19:10623624-10628607	-21.6	359-417	1750-1808	UTR3	-127			9	ENST00000369697	KCND3	chr1:112313285-112525418	-21.4	521-576	2908-2963	UTR3	-589.7
10	ENST00000263707	TFCP2L1	chr2:121974164-122042783	-21.4	222-277	1072-1127	CDS	-748			10	ENST00000221307	CYP4F3	chr19:15751711-15773635	-15.7	139-191	3072-3124	UTR3	-524.4
11	ENST00000369697	KCND3	chr1:112313285-112525418	-21.4	521-576	2908-2963	UTR3	-589.7			11	ENST00000369707	GSTO2	chr10:106034921-106064703	-17.4	158-205	1414-1461	UTR3	-521.5
12	ENST00000283303	GPR115	chr6:47666290-47689757	-21.3	29-76	2739-2786	UTR3	-304.6			12	ENST00000377022	CASZ1	chr1:10696662-10856705	-19.5	142-192	3668-3718	CDS	-467.3
13	ENST00000381848	PLIN5	chr19:4522544-4535236	-21.3	12420	1180-1233	CDS	-92			13	ENST00000374566	EPB41L4B	chr9:111934256-112083244	-18.7	254-301	2678-2725	CDS	-464.7
14	ENST00000398309	DLG2	chr11:83166056-84634633	-21.1	369-416	3679-3726	UTR3	-837.1			14	ENST00000295887	CDS1	chr4:85504133-85572491	-17.6	223-280	352-409	UTR5	-462.3
15	ENST00000349015	ALDH3B2	chr11:67429635-67442102	-20.9	158-209	2085-2136	UTR3	-197.7			15	ENST00000251808	GRHL2	chr8:102504661-102681954	-26.6	290-337	531-578	CDS	-447.6
16	ENST00000414691	ADTRP	chr6:11713758-11779403	-20.8	523-570	1190-1237	UTR3	-279.9			16	ENST00000369816	ELOVL4	chr6:80624530-80657297	-19.6	12055	107-158	UTR5	-420.8
17	ENST00000377122	NEBL	chr10:21068903-21186531	-20.5	406-461	1930-1985	CDS	-985.9			17	ENST00000359947	PTPRF	chr1:43996548-44089337	-17.5	308-355	2942-2989	CDS	-419.7
18	ENST00000221347	FCGBP	chr19:40353964-40440533	-20.5	336-383	14751-14798	CDS	-787.5			18	ENST00000341809	KRT77	chr12:53083411-53097247	-26.3	370-417	274-321	CDS	-417
19	ENST00000323090	SULT2B1	chr19:49078798-49102682	-20.5	139-192	879-932	CDS	-75.8			19	ENST00000284382	CERS3	chr15:100940601-101084925	-15	217-274	1934-1991	UTR3	-416.7
20	ENST00000281282	CGNL1	chr15:57668704-57842925	-20.3	483-537	736-790	CDS	-718.1			20	ENST00000254043	KRT15	chr17:39669996-39678665	-19.5	260-308	1479-1527	UTR5	-407.2
21	ENST00000297265	CHMP4C	chr8:82644670-82671750	-20.2	258-306	407-455	CDS	-201.1			21	ENST00000295190	SLC16A14	chr2:230899699-230933715	-15.5	310-357	3428-3475	UTR3	-391.6
22	ENST00000369816	ELOVL4	chr6:80624530-80657297	-19.6	12055	107-158	UTR5	-420.8			22	ENST00000358487	FGFR2	chr10:123237856-123357598	-16	360-409	1712-1761	CDS	-387.2
23	ENST00000377022	CASZ1	chr1:10696662-10856705	-19.5	142-192	3668-3718	CDS	-467.3			23	ENST00000555868	TMEM30B	chr14:61744089-61748558	-18.5	277-336	235-294	UTR5	-385.3
24	ENST00000254043	KRT15	chr17:39669996-39678665	-19.5	260-308	1479-1527	UTR5	-407.2			24	ENST00000367748	IL20RA	chr6:137321109-137366298	-15.1	324-379	2131-2186	UTR3	-378.1
25	ENST00000433647	VIPR1	chr3:42530792-42579059	-19.3	326-375	1475-1524	CDS	-268.9			25	ENST00000588982	ZBTB7C	chr18:45553045-45691937	-16	139-191	1874-1926	CDS	-375.7
26	ENST00000374566	EPB41L4B	chr9:111934256-112083244	-18.7	254-301	2678-2725	CDS	-464.7			26	ENST00000399899	CLDN8	chr21:31586325-31588391	-16.3	426-483	584-641	CDS	-364.8
27	ENST00000555868	TMEM30B	chr14:61744089-61748558	-18.5	277-336	235-294	UTR5	-385.3			27	ENST00000381661	ATP6V1C2	chr2:10861776-10925236	-16.9	203-252	224-273	CDS	-347.6
28	ENST00000433108	MIR205HG	chr1:209602166-209605890	-18.5	139-189	2913-2963	ncRNA	-264.5			28	ENST00000376503	SLC15A1	chr13:99336056-99404908	-13.2	228-281	1850-1903	CDS	-344.6
29	ENST00000311966	GLS2	chr12:56864737-56882181	-18.4	256-306	152-202	UTR5	-219.3			29	ENST00000440783	GPT2	chr16:46918748-46965200	-15.8	235-286	2261-2312	UTR3	-343.8
30	ENST00000372117	CDHR1	chr10:85954415-85977122	-18.3	274-331	2350-2407	CDS	-328.8			30	ENST00000254051	TNS4	chr17:38632081-38657849	-14.8	227-278	1136-1187	CDS	-328.9
31	ENST00000605938	ATG9B	chr7:150709336-150721586	-18.3	230-278	3397-3445	UTR3	-166.7			31	ENST00000372117	CDHR1	chr10:85954415-85977122	-18.3	274-331	2350-2407	CDS	-328.8
32	ENST00000265843	EXPH5	chr11:108376159-108464374	-17.8	271-320	3427-3476	CDS	-1180.1			32	ENST00000432424	SYN2	chr3:12045881-12227228	-17.4	258-306	969-1017	ncRNA	-328.2
33	ENST00000295887	CDS1	chr4:85504133-85572491	-17.6	223-280	352-409	UTR5	-462.3			33	ENST00000473183	ESRP2	chr16:68263030-68270487	-23.2	523-576	1504-1557	CDS	-317.1
34	ENST00000410009	CD207	chr2:71057348-71062952	-17.6	369-418	764-813	CDS	-160.5			34	ENST00000409359	ARHGEF4	chr2:131595029-131704803	-13.5	323-372	4037-4086	CDS	-308.4
35	ENST00000359947	PTPRF	chr1:43996548-44089337	-17.5	308-355	2942-2989	CDS	-419.7			35	ENST00000283303	GPR115	chr6:47666290-47689757	-21.3	29-76	2739-2786	UTR3	-304.6
36	ENST00000369707	GSTO2	chr10:106034921-106064703	-17.4	158-205	1414-1461	UTR3	-521.5			36	ENST00000358945	SCNN1A	chr12:6456012-6484390	-23.5	538-585	222-269	UTR5	-300.8
37	ENST00000432424	SYN2	chr3:12045881-12227228	-17.4	258-306	969-1017	ncRNA	-328.2			37	ENST00000324907	GRHL1	chr2:10091828-10142405	-14.6	557-606	1407-1456	CDS	-294.8
38	ENST00000300113	CHP2	chr16:23765949-23770272	-17.2	225-284	2098-2157	UTR3	-240.8			38	ENST00000414691	ADTRP	chr6:11713758-11779403	-20.8	523-570	1190-1237	UTR3	-279.9
39	ENST00000328945	SDR42E1	chr16:82031222-82045093	-17.1	502-563	1864-1925	UTR3	-219.3			39	ENST00000546530	RASAL1	chr12:113536625-113574029	-15.5	222-271	2436-2485	CDS	-277.8
40	ENST00000337225	CXCL14	chr5:134906374-134914969	-17.1	221-274	1424-1477	UTR3	-156.7			40	ENST00000433647	VIPR1	chr3:42530792-42579059	-19.3	326-375	1475-1524	CDS	-268.9
41	ENST00000381661	ATP6V1C2	chr2:10861776-10925236	-16.9	203-252	224-273	CDS	-347.6			41	ENST00000226247	FOXN1	chr17:26850960-26865914	-14.1	325-374	1275-1324	CDS	-268.2
42	ENST00000392957	EPHB6	chr7:142552793-142568847	-16.9	276-323	2785-2832	CDS	-228.6			42	ENST00000369779	SLC16A4	chr1:110905471-110933704	-16	166-215	1402-1451	CDS	-268
43	ENST00000269703	CYP4F22	chr19:15619305-15663128	-16.9	278-334	42-98	UTR5	-94.4			43	ENST00000297494	NOS3	chr7:150688084-150711676	-14.6	142-191	1594-1643	CDS	-266.8
44	ENST00000446248	CAMSAP3	chr19:7660789-7683190	-16.5	141-192	2368-2419	CDS	-210.3			44	ENST00000313234	KRT80	chr12:52562781-52585784	-13.8	591-629	2509-2559	UTR3	-266.4
45	ENST00000399899	CLDN8	chr21:31586325-31588391	-16.3	426-483	584-641	CDS	-364.8			45	ENST00000433108	MIR205HG	chr1:209602166-209605890	-18.5	139-189	2913-2963	ncRNA	-264.5
46	ENST00000301395	GGT6	chr17:4460223-4463876	-16.3	115-164	205-254	CDS	-170.6			46	ENST00000367021	IRF6	chr1:209959037-209979389	-12.7	475-528	3396-3449	UTR3	-264.3
47	ENST00000311852	MMP14	chr14:23305767-23316970	-16.2	278-325	2907-2954	UTR3	-138			47	ENST00000367342	C1orf106	chr1:200860470-200884863	-13.9	384-433	2870-2919	UTR3	-259
48	ENST00000394216	KCNK7	chr11:65360327-65363467	-16.2	236-287	1501-1552	UTR3	-99.6			48	ENST00000379328	GATA3	chr10:8096657-8117161	-15.3	430-480	17-67	UTR5	-257.8
49	ENST00000551171	RDH12	chr14:68168604-68201169	-16.1	329-380	1149-1200	CDS	-174.6			49	ENST00000422538	ENDOU	chr12:48103529-48119319	-12.4	413-460	19906	UTR5	-245.2
50	ENST00000457326	CAPNS2	chr16:55600585-55601599	-16.1	367-423	184-240	CDS	-117.3			50	ENST00000300113	CHP2	chr16:23765949-23770272	-17.2	225-284	2098-2157	UTR3	-240.8
51	ENST00000320567	C1orf172	chr1:27276054-27286897	-16.1	225-279	545-599	CDS	-53.1			51	ENST00000369230	PNLIPRP3	chr10:118187380-118237469	-12.1	590-629	946-1004	CDS	-240.6
52	ENST00000358487	FGFR2	chr10:123237856-123357598	-16	360-409	1712-1761	CDS	-387.2			52	ENST00000319098	PSAPL1	chr4:7432023-7436700	-16	12055	2281-2333	UTR3	-230
53	ENST00000588982	ZBTB7C	chr18:45553045-45691937	-16	139-191	1874-1926	CDS	-375.7			53	ENST00000392957	EPHB6	chr7:142552793-142568847	-16.9	276-323	2785-2832	CDS	-228.6
54	ENST00000369779	SLC16A4	chr1:110905471-110933704	-16	166-215	1402-1451	CDS	-268			54	ENST00000370325	GABRE	chrX:151121598-151143151	-12.2	259-306	618-665	CDS	-224.4
55	ENST00000319098	PSAPL1	chr4:7432023-7436700	-16	12055	2281-2333	UTR3	-230			55	ENST00000311966	GLS2	chr12:56864737-56882181	-18.4	256-306	152-202	UTR5	-219.3
56	ENST00000536300	SP6	chr17:45922281-45928559	-16	372-423	3776-3827	UTR3	-195.9			56	ENST00000328945	SDR42E1	chr16:82031222-82045093	-17.1	502-563	1864-1925	UTR3	-219.3
57	ENST00000440783	GPT2	chr16:46918748-46965200	-15.8	235-286	2261-2312	UTR3	-343.8			57	ENST00000301607	EVPL	chr17:74002927-74023533	-15.4	320-369	3471-3520	CDS	-216.8
58	ENST00000327726	CFD	chr19:859454-863453	-15.8	349-399	1182-1214	UTR3	-62.2			58	ENST00000446248	CAMSAP3	chr19:7660789-7683190	-16.5	141-192	2368-2419	CDS	-210.3
59	ENST00000221307	CYP4F3	chr19:15751711-15773635	-15.7	139-191	3072-3124	UTR3	-524.4			59	ENST00000260843	GPR87	chr3:151011892-151034740	-11.8	325-374	1058-1107	CDS	-209.8
60	ENST00000505790	IRX4	chr5:1877563-1887332	-15.7	139-189	943-993	CDS	-155.9			60	ENST00000230582	PRSS16	chr6:27215503-27224250	-15.4	257-304	2448-2495	UTR3	-203.3
61	ENST00000543823	SYTL1	chr1:27671365-27680421	-15.7	534-585	351-402	UTR5	-138.6			61	ENST00000297265	CHMP4C	chr8:82644670-82671750	-20.2	258-306	407-455	CDS	-201.1
62	ENST00000295190	SLC16A14	chr2:230899699-230933715	-15.5	310-357	3428-3475	UTR3	-391.6			62	ENST00000349015	ALDH3B2	chr11:67429635-67442102	-20.9	158-209	2085-2136	UTR3	-197.7
63	ENST00000546530	RASAL1	chr12:113536625-113574029	-15.5	222-271	2436-2485	CDS	-277.8			63	ENST00000244360	RNF39	chr6:30038044-30043664	-26.6	12055	484-535	CDS	-196.3
64	ENST00000432792	TMEM125	chr1:43735697-43739673	-15.5	590-629	1426-1479	UTR3	-64.5			64	ENST00000536300	SP6	chr17:45922281-45928559	-16	372-423	3776-3827	UTR3	-195.9
65	ENST00000301607	EVPL	chr17:74002927-74023533	-15.4	320-369	3471-3520	CDS	-216.8			65	ENST00000436615	RAPGEFL1	chr17:38334243-38351906	-12.4	145-192	2225-2272	UTR3	-195.1
66	ENST00000230582	PRSS16	chr6:27215503-27224250	-15.4	257-304	2448-2495	UTR3	-203.3			66	ENST00000330553	KRT79	chr12:53215232-53228079	-28.4	369-419	1508-1558	CDS	-191.2
67	ENST00000355594	ANKRD35	chr1:145549231-145568526	-15.4	247-294	3167-3214	UTR3	-179.7			67	ENST00000321276	SGPP2	chr2:223289237-223425667	-11.8	287-338	1120-1171	CDS	-185.6
68	ENST00000372394	ASS1	chr9:133320350-133376661	-15.4	325-376	394-445	UTR5	-170.1			68	ENST00000368094	IGSF9	chr1:159896830-159915386	-15.2	248-297	2239-2288	CDS	-183.5
69	ENST00000379328	GATA3	chr10:8096657-8117161	-15.3	430-480	17-67	UTR5	-257.8			69	ENST00000355594	ANKRD35	chr1:145549231-145568526	-15.4	247-294	3167-3214	UTR3	-179.7
70	ENST00000368094	IGSF9	chr1:159896830-159915386	-15.2	248-297	2239-2288	CDS	-183.5			70	ENST00000374900	FAAH2	chrX:57313140-57515629	-14.2	523-573	704-754	CDS	-179.3
71	ENST00000367748	IL20RA	chr6:137321109-137366298	-15.1	324-379	2131-2186	UTR3	-378.1			71	ENST00000602346	TP53AIP1	chr11:128805273-128812822	-14.8	597-629	2087-2135	UTR3	-177.8
72	ENST00000278601	C11orf52	chr11:111789602-111797596	-15.1	349-397	48-96	UTR5	-96			72	ENST00000220420	TGM5	chr15:43524794-43559055	-11.3	276-329	1982-2035	CDS	-176.5
73	ENST00000284382	CERS3	chr15:100940601-101084925	-15	217-274	1934-1991	UTR3	-416.7			73	ENST00000318962	ALS2CL	chr3:46710680-46735191	-12.2	142-191	1793-1842	CDS	-175.7
74	ENST00000326152	HSD11B2	chr16:67465021-67471456	-14.9	328-381	1230-1283	CDS	-128.5			74	ENST00000551171	RDH12	chr14:68168604-68201169	-16.1	329-380	1149-1200	CDS	-174.6
75	ENST00000254051	TNS4	chr17:38632081-38657849	-14.8	227-278	1136-1187	CDS	-328.9			75	ENST00000301395	GGT6	chr17:4460223-4463876	-16.3	115-164	205-254	CDS	-170.6
76	ENST00000602346	TP53AIP1	chr11:128805273-128812822	-14.8	597-629	2087-2135	UTR3	-177.8			76	ENST00000372394	ASS1	chr9:133320350-133376661	-15.4	325-376	394-445	UTR5	-170.1
77	ENST00000418234	PPP1R13L	chr19:45882897-45909607	-14.7	245-292	1596-1643	CDS	-166.8			77	ENST00000261891	DAPK2	chr15:64199236-64332466	-13.6	357-407	189-239	CDS	-167.2
78	ENST00000324907	GRHL1	chr2:10091828-10142405	-14.6	557-606	1407-1456	CDS	-294.8			78	ENST00000418234	PPP1R13L	chr19:45882897-45909607	-14.7	245-292	1596-1643	CDS	-166.8
79	ENST00000297494	NOS3	chr7:150688084-150711676	-14.6	142-191	1594-1643	CDS	-266.8			79	ENST00000605938	ATG9B	chr7:150709336-150721586	-18.3	230-278	3397-3445	UTR3	-166.7
80	ENST00000260264	POU2F3	chr11:120107350-120190653	-14.5	281-330	1181-1230	CDS	-154.2			80	ENST00000410009	CD207	chr2:71057348-71062952	-17.6	369-418	764-813	CDS	-160.5
81	ENST00000527815	AIM1L	chr1:26648351-26670576	-14.4	12420	2487-2523	UTR3	-126.6			81	ENST00000337225	CXCL14	chr5:134906374-134914969	-17.1	221-274	1424-1477	UTR3	-156.7
82	ENST00000300057	MESP1	chr15:90291893-90294541	-14.4	230-281	1709-1760	UTR3	-111.7			82	ENST00000337334	ABHD12B	chr14:51338879-51371688	-12.9	543-594	261-312	CDS	-156
83	ENST00000449963	AC010891.2	chrY:9650925-9655122	-14.4	167-214	253-300	ncRNA	-59.4			83	ENST00000505790	IRX4	chr5:1877563-1887332	-15.7	139-189	943-993	CDS	-155.9
84	ENST00000413453	CKMT1A	chr15:43985726-43991420	-14.3	139-188	1743-1792	CDS,stop_codon	-154.1			84	ENST00000260264	POU2F3	chr11:120107350-120190653	-14.5	281-330	1181-1230	CDS	-154.2
85	ENST00000374900	FAAH2	chrX:57313140-57515629	-14.2	523-573	704-754	CDS	-179.3			85	ENST00000413453	CKMT1A	chr15:43985726-43991420	-14.3	139-188	1743-1792	CDS,stop_codon	-154.1
86	ENST00000343070	SCNN1B	chr16:23313592-23392620	-14.2	251-306	2156-2211	UTR3	-141.7			86	ENST00000373366	GJB3	chr1:35246791-35251965	-22.2	30-79	687-736	CDS	-150.6
87	ENST00000226247	FOXN1	chr17:26850960-26865914	-14.1	325-374	1275-1324	CDS	-268.2			87	ENST00000541714	TJP3	chr19:3708108-3750810	-12.9	278-326	14246	UTR5	-149.4
88	ENST00000504449	PCP4L1	chr1:161228518-161255240	-14.1	496-544	992-1040	UTR3	-124.8			88	ENST00000343070	SCNN1B	chr16:23313592-23392620	-14.2	251-306	2156-2211	UTR3	-141.7
89	ENST00000375819	LY6G6C	chr6:31686426-31689622	-14	42397	708-755	UTR3	-65.4			89	ENST00000543823	SYTL1	chr1:27671365-27680421	-15.7	534-585	351-402	UTR5	-138.6
90	ENST00000367342	C1orf106	chr1:200860470-200884863	-13.9	384-433	2870-2919	UTR3	-259			90	ENST00000311852	MMP14	chr14:23305767-23316970	-16.2	278-325	2907-2954	UTR3	-138
91	ENST00000313234	KRT80	chr12:52562781-52585784	-13.8	591-629	2509-2559	UTR3	-266.4			91	ENST00000589373	KLC3	chr19:45836693-45853645	-12.7	222-269	981-1028	CDS	-136
92	ENST00000261891	DAPK2	chr15:64199236-64332466	-13.6	357-407	189-239	CDS	-167.2			92	ENST00000293774	KRT4	chr12:53200334-53208335	-11.8	224-273	1314-1363	CDS	-131.1
93	ENST00000295294	BNIPL	chr1:151009092-151020062	-13.6	287-334	1783-1830	UTR3	-102.1			93	ENST00000326152	HSD11B2	chr16:67465021-67471456	-14.9	328-381	1230-1283	CDS	-128.5
94	ENST00000409359	ARHGEF4	chr2:131595029-131704803	-13.5	323-372	4037-4086	CDS	-308.4			94	ENST00000439028	S1PR5	chr19:10623624-10628607	-21.6	359-417	1750-1808	UTR3	-127
95	ENST00000376503	SLC15A1	chr13:99336056-99404908	-13.2	228-281	1850-1903	CDS	-344.6			95	ENST00000527815	AIM1L	chr1:26648351-26670576	-14.4	12420	2487-2523	UTR3	-126.6
96	ENST00000317508	PRSS8	chr16:31142757-31147083	-13.1	231-282	987-1038	CDS	-79.2			96	ENST00000504449	PCP4L1	chr1:161228518-161255240	-14.1	496-544	992-1040	UTR3	-124.8
97	ENST00000297439	DEFB1	chr8:6728098-6735544	-13.1	157-204	13150	UTR5	-28.8			97	ENST00000457326	CAPNS2	chr16:55600585-55601599	-16.1	367-423	184-240	CDS	-117.3
98	ENST00000219368	FA2H	chr16:74746854-74808723	-13	139-191	1052-1104	CDS	-99.2			98	ENST00000409642	LYPD6B	chr2:149894982-150071776	-11.2	285-338	454-507	CDS	-117.3
99	ENST00000337334	ABHD12B	chr14:51338879-51371688	-12.9	543-594	261-312	CDS	-156			99	ENST00000307486	C2orf54	chr2:241825467-241831455	-10.2	311-358	730-777	CDS	-114.8
100	ENST00000541714	TJP3	chr19:3708108-3750810	-12.9	278-326	14246	UTR5	-149.4			100	ENST00000300057	MESP1	chr15:90291893-90294541	-14.4	230-281	1709-1760	UTR3	-111.7
101	ENST00000433979	PIK3C2G	chr12:18414475-18801348	-12.8	491-538	1079-1126	CDS	-611			101	ENST00000279263	TM7SF2	chr11:64879327-64883828	-12.7	141-192	1406-1457	CDS,stop_codon	-109.5
102	ENST00000454677	HS3ST6	chr16:1961465-1968441	-12.8	273-324	1058-1109	CDS	-31.8			102	ENST00000255409	CHI3L1	chr1:203148060-203155877	-11.7	219-274	230-285	CDS	-108.9
103	ENST00000367021	IRF6	chr1:209959037-209979389	-12.7	475-528	3396-3449	UTR3	-264.3			103	ENST00000295294	BNIPL	chr1:151009092-151020062	-13.6	287-334	1783-1830	UTR3	-102.1
104	ENST00000589373	KLC3	chr19:45836693-45853645	-12.7	222-269	981-1028	CDS	-136			104	ENST00000394216	KCNK7	chr11:65360327-65363467	-16.2	236-287	1501-1552	UTR3	-99.6
105	ENST00000279263	TM7SF2	chr11:64879327-64883828	-12.7	141-192	1406-1457	CDS,stop_codon	-109.5			105	ENST00000380183	ALOX15B	chr17:7942336-7952452	-11.7	274-327	267-320	CDS	-99.4
106	ENST00000422538	ENDOU	chr12:48103529-48119319	-12.4	413-460	19906	UTR5	-245.2			106	ENST00000219368	FA2H	chr16:74746854-74808723	-13	139-191	1052-1104	CDS	-99.2
107	ENST00000436615	RAPGEFL1	chr17:38334243-38351906	-12.4	145-192	2225-2272	UTR3	-195.1			107	ENST00000278601	C11orf52	chr11:111789602-111797596	-15.1	349-397	48-96	UTR5	-96
108	ENST00000370325	GABRE	chrX:151121598-151143151	-12.2	259-306	618-665	CDS	-224.4			108	ENST00000269703	CYP4F22	chr19:15619305-15663128	-16.9	278-334	42-98	UTR5	-94.4
109	ENST00000318962	ALS2CL	chr3:46710680-46735191	-12.2	142-191	1793-1842	CDS	-175.7			109	ENST00000381848	PLIN5	chr19:4522544-4535236	-21.3	12420	1180-1233	CDS	-92
110	ENST00000369230	PNLIPRP3	chr10:118187380-118237469	-12.1	590-629	946-1004	CDS	-240.6			110	ENST00000590923	AP1M2	chr19:10683348-10697991	-11.9	144-191	270-317	CDS	-87
111	ENST00000590923	AP1M2	chr19:10683348-10697991	-11.9	144-191	270-317	CDS	-87			111	ENST00000261733	ALDH2	chr12:112204727-112247782	-10.2	358-412	1962-2016	UTR3	-84.6
112	ENST00000260843	GPR87	chr3:151011892-151034740	-11.8	325-374	1058-1107	CDS	-209.8			112	ENST00000539627	TMEM91	chr19:41856817-41889988	-11.4	594-629	629-677	CDS	-79.5
113	ENST00000321276	SGPP2	chr2:223289237-223425667	-11.8	287-338	1120-1171	CDS	-185.6			113	ENST00000317508	PRSS8	chr16:31142757-31147083	-13.1	231-282	987-1038	CDS	-79.2
114	ENST00000293774	KRT4	chr12:53200334-53208335	-11.8	224-273	1314-1363	CDS	-131.1			114	ENST00000220507	RHOV	chr15:41164413-41166487	-11.7	351-398	595-642	CDS	-76.7
115	ENST00000255409	CHI3L1	chr1:203148060-203155877	-11.7	219-274	230-285	CDS	-108.9			115	ENST00000323090	SULT2B1	chr19:49078798-49102682	-20.5	139-192	879-932	CDS	-75.8
116	ENST00000380183	ALOX15B	chr17:7942336-7952452	-11.7	274-327	267-320	CDS	-99.4			116	ENST00000375819	LY6G6C	chr6:31686426-31689622	-14	42397	708-755	UTR3	-65.4
117	ENST00000220507	RHOV	chr15:41164413-41166487	-11.7	351-398	595-642	CDS	-76.7			117	ENST00000432792	TMEM125	chr1:43735697-43739673	-15.5	590-629	1426-1479	UTR3	-64.5
118	ENST00000515291	C5orf46	chr5:147280872-147286101	-11.6	491-539	150-198	CDS	-61.9			118	ENST00000327726	CFD	chr19:859454-863453	-15.8	349-399	1182-1214	UTR3	-62.2
119	ENST00000539627	TMEM91	chr19:41856817-41889988	-11.4	594-629	629-677	CDS	-79.5			119	ENST00000515291	C5orf46	chr5:147280872-147286101	-11.6	491-539	150-198	CDS	-61.9
120	ENST00000220420	TGM5	chr15:43524794-43559055	-11.3	276-329	1982-2035	CDS	-176.5			120	ENST00000449963	AC010891.2	chrY:9650925-9655122	-14.4	167-214	253-300	ncRNA	-59.4
121	ENST00000409642	LYPD6B	chr2:149894982-150071776	-11.2	285-338	454-507	CDS	-117.3			121	ENST00000320567	C1orf172	chr1:27276054-27286897	-16.1	225-279	545-599	CDS	-53.1
122	ENST00000320477	CIDEA	chr18:12254319-12277372	-10.8	30-79	632-681	CDS	-49.3			122	ENST00000320477	CIDEA	chr18:12254319-12277372	-10.8	30-79	632-681	CDS	-49.3
123	ENST00000307486	C2orf54	chr2:241825467-241831455	-10.2	311-358	730-777	CDS	-114.8			123	ENST00000454677	HS3ST6	chr16:1961465-1968441	-12.8	273-324	1058-1109	CDS	-31.8
124	ENST00000261733	ALDH2	chr12:112204727-112247782	-10.2	358-412	1962-2016	UTR3	-84.6			124	ENST00000297439	DEFB1	chr8:6728098-6735544	-13.1	157-204	13150	UTR5	-28.8
125	ENST00000570670	ZG16B	chr16:2880255-2888967	-7.3	442-495	549-602	UTR3	-20.5			125	ENST00000570670	ZG16B	chr16:2880255-2888967	-7.3	442-495	549-602	UTR3	-20.5

## Sheet: MMN
Table S14 Partial list of mRNAs interacting with ENST00000565315 (RP11-532F12.5), sorted by MinEnergy											Table S14 Partial list of mRNAs interacting with ENST00000565315 (RP11-532F12.5), sorted by SumEnergy
				MinEnergy											MinEnergy
Rank	Ensemble ID	Name	Position (hg19)	MinEnergy	BS(query)	BS(target)	location	SumEnergy			Rank	Ensemble ID	Name	Position (hg19)	MinEnergy	BS(query)	BS(target)	location	SumEnergy
1	ENST00000330553	KRT79	chr12:53215232-53228079	-28.4	369-419	1508-1558	CDS	-191.2			1	ENST00000378024	AHNAK	chr11:62283378-62314307	-23.6	320-369	18437-18486	UTR3	-2137.2
2	ENST00000548411	BICD1	chr12:32260086-32536567	-28.3	550-603	600-653	CDS	-937.2			2	ENST00000333407	FAM83F	chr22:40390954-40439533	-25.1	527-587	11740-11800	UTR3	-1305.1
3	ENST00000539839	FZD10	chr12:130647005-130650285	-26.8	372-422	3013-3063	UTR3	-198.3			3	ENST00000265843	EXPH5	chr11:108376159-108464374	-17.8	271-320	3427-3476	CDS	-1180.1
4	ENST00000251808	GRHL2	chr8:102504661-102681954	-26.6	290-337	531-578	CDS	-447.6			4	ENST00000335670	RORA	chr15:60780484-61521518	-19.9	287-336	5639-5688	UTR3	-1155.9
5	ENST00000244360	RNF39	chr6:30038044-30043664	-26.6	12055	484-535	CDS	-196.3			5	ENST00000261800	FAT2	chr5:150883656-150948505	-24.2	321-370	4564-4613	CDS	-1152
6	ENST00000341809	KRT77	chr12:53083411-53097247	-26.3	370-417	274-321	CDS	-417			6	ENST00000304385	TMEM154	chr4:153539785-153601317	-22.3	250-302	9541-9593	UTR3	-1095.7
7	ENST00000573514	CCDC64B	chr16:3077686-3083003	-26	242-295	3268-3321	UTR3	-220.5			7	ENST00000377122	NEBL	chr10:21068903-21186531	-20.5	406-461	1930-1985	CDS	-985.9
8	ENST00000299164	ADAMTS15	chr11:130318870-130346532	-25.2	370-417	4896-4943	UTR3	-280.4			8	ENST00000278550	TENM4	chr11:78363877-79151695	-22.6	249-301	12519-12571	UTR3	-964.8
9	ENST00000333407	FAM83F	chr22:40390954-40439533	-25.1	527-587	11740-11800	UTR3	-1305.1			9	ENST00000548411	BICD1	chr12:32260086-32536567	-28.3	550-603	600-653	CDS	-937.2
10	ENST00000275815	EPHA1	chr7:143088206-143105985	-24.7	540-592	3191-3243	UTR3	-199.6			10	ENST00000262094	RAB27B	chr18:52495431-52562747	-13.9	600-629	5734-5783	UTR3	-862.1
11	ENST00000306858	FAM83B	chr6:54711570-54806820	-24.6	325-372	1907-1954	CDS	-347.3			11	ENST00000404260	MAST4	chr5:65892177-66465423	-15	139-186	6078-6125	CDS	-847.4
12	ENST00000261800	FAT2	chr5:150883656-150948505	-24.2	321-370	4564-4613	CDS	-1152			12	ENST00000275493	EGFR	chr7:55086795-55279321	-17.1	37-84	9267-9314	UTR3	-800.5
13	ENST00000263182	BBOX1	chr11:27062510-27149354	-24.2	520-575	1037-1092	CDS	-232.3			13	ENST00000374690	AR	chrX:66764466-66950461	-20.6	156-209	3479-3532	UTR3	-779.6
14	ENST00000533983	ARNT2	chr15:80733573-80890269	-23.9	251-300	3254-3303	UTR3	-492.2			14	ENST00000370924	PTGER3	chr1:71472315-71513491	-16	493-540	2215-2262	UTR3	-768.8
15	ENST00000378024	AHNAK	chr11:62283378-62314307	-23.6	320-369	18437-18486	UTR3	-2137.2			15	ENST00000263707	TFCP2L1	chr2:121974164-122042783	-21.4	222-277	1072-1127	CDS	-748
16	ENST00000358945	SCNN1A	chr12:6456012-6484390	-23.5	538-585	222-269	UTR5	-300.8			16	ENST00000519560	SLIT3	chr5:168088746-168728133	-20.2	277-331	1833-1887	CDS	-719.4
17	ENST00000473183	ESRP2	chr16:68263030-68270487	-23.2	523-576	1504-1557	CDS	-317.1			17	ENST00000295092	FAM84A	chr2:14772811-14780170	-21.7	273-328	1018-1073	CDS	-675.5
18	ENST00000278550	TENM4	chr11:78363877-79151695	-22.6	249-301	12519-12571	UTR3	-964.8			18	ENST00000371900	SLC6A14	chrX:115567791-115592625	-19.3	522-574	4176-4228	UTR3	-661.4
19	ENST00000304385	TMEM154	chr4:153539785-153601317	-22.3	250-302	9541-9593	UTR3	-1095.7			19	ENST00000337532	MPP7	chr10:28339923-28569071	-15.2	376-423	2054-2101	UTR3	-639.4
20	ENST00000367012	SERTAD4	chr1:210406145-210419600	-22.3	365-417	2272-2324	UTR3	-517.9			20	ENST00000393274	DENND2C	chr1:115125472-115212656	-16.3	233-286	3067-3120	CDS	-639
21	ENST00000399816	UBE2QL1	chr5:6448737-6495022	-22.2	245-298	3764-3817	UTR3	-292.4			21	ENST00000366539	AKT3	chr1:243665066-244013430	-17.2	156-203	1715-1762	UTR3	-623.5
22	ENST00000373366	GJB3	chr1:35246791-35251965	-22.2	30-79	687-736	CDS	-150.6			22	ENST00000433979	PIK3C2G	chr12:18414475-18801348	-12.8	491-538	1079-1126	CDS	-611
23	ENST00000280758	BTBD11	chr12:107712191-108053419	-22.1	222-276	2225-2279	CDS	-433.2			23	ENST00000226067	HLF	chr17:53342374-53402426	-19.3	235-288	2228-2281	UTR3	-562
24	ENST00000317620	PROM2	chr2:95940202-95957051	-22.1	218-268	792-842	CDS	-247.4			24	ENST00000335449	GLDN	chr15:51633827-51700210	-17.1	372-426	3028-3082	UTR3	-549.2
25	ENST00000295092	FAM84A	chr2:14772811-14780170	-21.7	273-328	1018-1073	CDS	-675.5			25	ENST00000334504	COL4A6	chrX:107398838-107681660	-18	46-98	1652-1704	CDS	-536.9
26	ENST00000340107	FGFR3	chr4:1795040-1810599	-21.5	39-88	2790-2839	UTR3	-312.9			26	ENST00000345382	BNC1	chr15:83924656-83953466	-15.7	427-474	1451-1498	CDS	-533.2
27	ENST00000263707	TFCP2L1	chr2:121974164-122042783	-21.4	222-277	1072-1127	CDS	-748			27	ENST00000369707	GSTO2	chr10:106034921-106064703	-17.4	158-205	1414-1461	UTR3	-521.5
28	ENST00000296370	S100P	chr4:6694797-6698896	-21.4	230-283	1169-1222	UTR3	-75.8			28	ENST00000367012	SERTAD4	chr1:210406145-210419600	-22.3	365-417	2272-2324	UTR3	-517.9
29	ENST00000283303	GPR115	chr6:47666290-47689757	-21.3	29-76	2739-2786	UTR3	-304.6			29	ENST00000303694	CHST11	chr12:104850752-105155792	-15	231-285	3617-3671	UTR3	-513.5
30	ENST00000367278	LGR6	chr1:202163030-202288909	-21.1	517-567	3291-3341	UTR3	-258.3			30	ENST00000511217	SH3RF2	chr5:145317441-145461354	-17.6	214-266	2556-2608	UTR3	-498.8
31	ENST00000374690	AR	chrX:66764466-66950461	-20.6	156-209	3479-3532	UTR3	-779.6			31	ENST00000533983	ARNT2	chr15:80733573-80890269	-23.9	251-300	3254-3303	UTR3	-492.2
32	ENST00000314124	TMEM40	chr3:12775025-12801038	-20.6	323-376	370-423	CDS	-155.5			32	ENST00000359470	C1orf116	chr1:207191867-207206092	-19.2	286-338	2119-2171	UTR3	-485.5
33	ENST00000377122	NEBL	chr10:21068903-21186531	-20.5	406-461	1930-1985	CDS	-985.9			33	ENST00000377022	CASZ1	chr1:10696662-10856705	-19.5	142-192	3668-3718	CDS	-467.3
34	ENST00000323090	SULT2B1	chr19:49078798-49102682	-20.5	139-192	879-932	CDS	-75.8			34	ENST00000374566	EPB41L4B	chr9:111934256-112083244	-18.7	254-301	2678-2725	CDS	-464.7
35	ENST00000519560	SLIT3	chr5:168088746-168728133	-20.2	277-331	1833-1887	CDS	-719.4			35	ENST00000295887	CDS1	chr4:85504133-85572491	-17.6	223-280	352-409	UTR5	-462.3
36	ENST00000297265	CHMP4C	chr8:82644670-82671750	-20.2	258-306	407-455	CDS	-201.1			36	ENST00000244728	COL21A1	chr6:55921389-56112544	-15.8	423-472	1586-1635	CDS	-461.5
37	ENST00000380149	ALOXE3	chr17:7999219-8021807	-20.1	143-192	1792-1841	CDS	-244.3			37	ENST00000217289	FERMT1	chr20:6055493-6104191	-15.9	156-203	5028-5075	UTR3	-455.7
38	ENST00000335670	RORA	chr15:60780484-61521518	-19.9	287-336	5639-5688	UTR3	-1155.9			38	ENST00000251808	GRHL2	chr8:102504661-102681954	-26.6	290-337	531-578	CDS	-447.6
39	ENST00000369816	ELOVL4	chr6:80624530-80657297	-19.6	12055	107-158	UTR5	-420.8			39	ENST00000280758	BTBD11	chr12:107712191-108053419	-22.1	222-276	2225-2279	CDS	-433.2
40	ENST00000377022	CASZ1	chr1:10696662-10856705	-19.5	142-192	3668-3718	CDS	-467.3			40	ENST00000421351	PERP	chr6:138409643-138428648	-15	241-288	2281-2328	UTR3	-422.8
41	ENST00000254043	KRT15	chr17:39669996-39678665	-19.5	260-308	1479-1527	UTR5	-407.2			41	ENST00000335712	BCL11A	chr2:60684334-60780633	-18.7	501-554	3094-3147	UTR3	-422.5
42	ENST00000435050	CLDN4	chr7:73242075-73247014	-19.5	323-372	1476-1525	UTR5	-265.9			42	ENST00000369816	ELOVL4	chr6:80624530-80657297	-19.6	12055	107-158	UTR5	-420.8
43	ENST00000371900	SLC6A14	chrX:115567791-115592625	-19.3	522-574	4176-4228	UTR3	-661.4			43	ENST00000341809	KRT77	chr12:53083411-53097247	-26.3	370-417	274-321	CDS	-417
44	ENST00000226067	HLF	chr17:53342374-53402426	-19.3	235-288	2228-2281	UTR3	-562			44	ENST00000284382	CERS3	chr15:100940601-101084925	-15	217-274	1934-1991	UTR3	-416.7
45	ENST00000433647	VIPR1	chr3:42530792-42579059	-19.3	326-375	1475-1524	CDS	-268.9			45	ENST00000345988	PPL	chr16:4932509-4987136	-14.9	330-382	1064-1116	CDS	-412.2
46	ENST00000359470	C1orf116	chr1:207191867-207206092	-19.2	286-338	2119-2171	UTR3	-485.5			46	ENST00000254043	KRT15	chr17:39669996-39678665	-19.5	260-308	1479-1527	UTR5	-407.2
47	ENST00000209718	KRT23	chr17:39078949-39093672	-19.2	425-490	1640-1705	CDS,stop_codon	-143.5			47	ENST00000358487	FGFR2	chr10:123237856-123357598	-16	360-409	1712-1761	CDS	-387.2
48	ENST00000436592	C5orf27	chr5:95187937-95195837	-19.1	359-410	1462-1513	UTR3	-254.6			48	ENST00000454295	MARVELD2	chr5:68710955-68740157	-13.7	378-426	3033-3081	UTR3	-387
49	ENST00000250055	SOX15	chr17:7491497-7493488	-19	523-586	16803	UTR5	-91.4			49	ENST00000555868	TMEM30B	chr14:61744089-61748558	-18.5	277-336	235-294	UTR5	-385.3
50	ENST00000262713	AJUBA	chr14:23440384-23451851	-18.8	139-192	1429-1482	CDS	-327.3			50	ENST00000535157	SCEL	chr13:78109810-78219394	-14.3	219-268	1750-1799	CDS	-381.1
51	ENST00000374566	EPB41L4B	chr9:111934256-112083244	-18.7	254-301	2678-2725	CDS	-464.7			51	ENST00000367748	IL20RA	chr6:137321109-137366298	-15.1	324-379	2131-2186	UTR3	-378.1
52	ENST00000335712	BCL11A	chr2:60684334-60780633	-18.7	501-554	3094-3147	UTR3	-422.5			52	ENST00000588982	ZBTB7C	chr18:45553045-45691937	-16	139-191	1874-1926	CDS	-375.7
53	ENST00000417257	FRMD5	chr15:44162963-44487429	-18.7	254-304	3271-3321	UTR3	-374.1			53	ENST00000305249	TACR1	chr2:75273591-75426826	-14.9	494-552	1140-1198	CDS	-375.3
54	ENST00000358777	CEACAM19	chr19:45174725-45187631	-18.6	12420	962-1009	CDS	-185.2			54	ENST00000417257	FRMD5	chr15:44162963-44487429	-18.7	254-304	3271-3321	UTR3	-374.1
55	ENST00000555868	TMEM30B	chr14:61744089-61748558	-18.5	277-336	235-294	UTR5	-385.3			55	ENST00000264144	LAMC2	chr1:183155424-183214035	-17.2	157-205	1808-1856	CDS	-370.5
56	ENST00000262483	PITPNM3	chr17:6354586-6459814	-18.5	29-83	1247-1301	CDS	-297.4			56	ENST00000399899	CLDN8	chr21:31586325-31588391	-16.3	426-483	584-641	CDS	-364.8
57	ENST00000433108	MIR205HG	chr1:209602166-209605890	-18.5	139-189	2913-2963	ncRNA	-264.5			57	ENST00000155926	TRIB2	chr2:12857016-12882860	-12.7	507-571	4306-4370	UTR3	-354.1
58	ENST00000375315	C9orf3	chr9:97522067-97849440	-18.5	522-576	442-496	CDS	-189.8			58	ENST00000381661	ATP6V1C2	chr2:10861776-10925236	-16.9	203-252	224-273	CDS	-347.6
59	ENST00000535861	ZNF185	chrX:152082987-152142024	-18.4	241-304	2786-2849	UTR3	-277			59	ENST00000306858	FAM83B	chr6:54711570-54806820	-24.6	325-372	1907-1954	CDS	-347.3
60	ENST00000605938	ATG9B	chr7:150709336-150721586	-18.3	230-278	3397-3445	UTR3	-166.7			60	ENST00000376503	SLC15A1	chr13:99336056-99404908	-13.2	228-281	1850-1903	CDS	-344.6
61	ENST00000269394	ZNF750	chr17:80787312-80798454	-18.2	274-335	43-104	UTR5	-227.7			61	ENST00000440783	GPT2	chr16:46918748-46965200	-15.8	235-286	2261-2312	UTR3	-343.8
62	ENST00000296839	FOXQ1	chr6:1312676-1314992	-18.2	330-382	761-813	CDS	-114.5			62	ENST00000254051	TNS4	chr17:38632081-38657849	-14.8	227-278	1136-1187	CDS	-328.9
63	ENST00000314014	C12orf54	chr12:48876287-48890295	-18.1	528-590	13-75	UTR5	-101.9			63	ENST00000262713	AJUBA	chr14:23440384-23451851	-18.8	139-192	1429-1482	CDS	-327.3
64	ENST00000334504	COL4A6	chrX:107398838-107681660	-18	46-98	1652-1704	CDS	-536.9			64	ENST00000406397	VSNL1	chr2:17722428-17838285	-17.6	535-589	609-663	CDS	-323.5
65	ENST00000331782	JAG2	chr14:105607319-105635161	-17.9	52-99	1197-1244	CDS	-289.9			65	ENST00000473183	ESRP2	chr16:68263030-68270487	-23.2	523-576	1504-1557	CDS	-317.1
66	ENST00000265843	EXPH5	chr11:108376159-108464374	-17.8	271-320	3427-3476	CDS	-1180.1			66	ENST00000340107	FGFR3	chr4:1795040-1810599	-21.5	39-88	2790-2839	UTR3	-312.9
67	ENST00000304501	SOX7	chr8:10581279-10588022	-17.8	522-569	2148-2195	UTR3	-285.1			67	ENST00000409359	ARHGEF4	chr2:131595029-131704803	-13.5	323-372	4037-4086	CDS	-308.4
68	ENST00000511217	SH3RF2	chr5:145317441-145461354	-17.6	214-266	2556-2608	UTR3	-498.8			68	ENST00000283303	GPR115	chr6:47666290-47689757	-21.3	29-76	2739-2786	UTR3	-304.6
69	ENST00000295887	CDS1	chr4:85504133-85572491	-17.6	223-280	352-409	UTR5	-462.3			69	ENST00000200181	ITGB4	chr17:73717517-73753899	-15	289-338	5308-5357	CDS	-302.1
70	ENST00000406397	VSNL1	chr2:17722428-17838285	-17.6	535-589	609-663	CDS	-323.5			70	ENST00000358945	SCNN1A	chr12:6456012-6484390	-23.5	538-585	222-269	UTR5	-300.8
71	ENST00000328041	SLC24A3	chr20:19193291-19703581	-17.6	369-416	1692-1739	CDS	-225.4			71	ENST00000262483	PITPNM3	chr17:6354586-6459814	-18.5	29-83	1247-1301	CDS	-297.4
72	ENST00000410009	CD207	chr2:71057348-71062952	-17.6	369-418	764-813	CDS	-160.5			72	ENST00000399816	UBE2QL1	chr5:6448737-6495022	-22.2	245-298	3764-3817	UTR3	-292.4
73	ENST00000369707	GSTO2	chr10:106034921-106064703	-17.4	158-205	1414-1461	UTR3	-521.5			73	ENST00000331782	JAG2	chr14:105607319-105635161	-17.9	52-99	1197-1244	CDS	-289.9
74	ENST00000366539	AKT3	chr1:243665066-244013430	-17.2	156-203	1715-1762	UTR3	-623.5			74	ENST00000304501	SOX7	chr8:10581279-10588022	-17.8	522-569	2148-2195	UTR3	-285.1
75	ENST00000264144	LAMC2	chr1:183155424-183214035	-17.2	157-205	1808-1856	CDS	-370.5			75	ENST00000262487	ISM1	chr20:13202419-13281298	-16.7	323-375	2176-2228	UTR3	-280.7
76	ENST00000300113	CHP2	chr16:23765949-23770272	-17.2	225-284	2098-2157	UTR3	-240.8			76	ENST00000299164	ADAMTS15	chr11:130318870-130346532	-25.2	370-417	4896-4943	UTR3	-280.4
77	ENST00000268933	EPN3	chr17:48609905-48621111	-17.2	223-271	2845-2893	UTR3	-196.2			77	ENST00000535861	ZNF185	chrX:152082987-152142024	-18.4	241-304	2786-2849	UTR3	-277
78	ENST00000275493	EGFR	chr7:55086795-55279321	-17.1	37-84	9267-9314	UTR3	-800.5			78	ENST00000433647	VIPR1	chr3:42530792-42579059	-19.3	326-375	1475-1524	CDS	-268.9
79	ENST00000335449	GLDN	chr15:51633827-51700210	-17.1	372-426	3028-3082	UTR3	-549.2			79	ENST00000226247	FOXN1	chr17:26850960-26865914	-14.1	325-374	1275-1324	CDS	-268.2
80	ENST00000328945	SDR42E1	chr16:82031222-82045093	-17.1	502-563	1864-1925	UTR3	-219.3			80	ENST00000313234	KRT80	chr12:52562781-52585784	-13.8	591-629	2509-2559	UTR3	-266.4
81	ENST00000381661	ATP6V1C2	chr2:10861776-10925236	-16.9	203-252	224-273	CDS	-347.6			81	ENST00000435050	CLDN4	chr7:73242075-73247014	-19.5	323-372	1476-1525	UTR5	-265.9
82	ENST00000289429	CD1A	chr1:158223928-158228059	-16.9	254-305	1832-1883	UTR3	-246.9			82	ENST00000433108	MIR205HG	chr1:209602166-209605890	-18.5	139-189	2913-2963	ncRNA	-264.5
83	ENST00000392957	EPHB6	chr7:142552793-142568847	-16.9	276-323	2785-2832	CDS	-228.6			83	ENST00000367021	IRF6	chr1:209959037-209979389	-12.7	475-528	3396-3449	UTR3	-264.3
84	ENST00000371225	TACSTD2	chr1:59041100-59043166	-16.9	278-329	196-247	UTR5	-165.3			84	ENST00000375471	PADI1	chr1:17531622-17572500	-16.1	274-327	367-420	CDS	-262.6
85	ENST00000269703	CYP4F22	chr19:15619305-15663128	-16.9	278-334	42-98	UTR5	-94.4			85	ENST00000367278	LGR6	chr1:202163030-202288909	-21.1	517-567	3291-3341	UTR3	-258.3
86	ENST00000331563	PKP3	chr11:394218-404908	-16.8	237-287	2660-2710	UTR3	-126.5			86	ENST00000436592	C5orf27	chr5:95187937-95195837	-19.1	359-410	1462-1513	UTR3	-254.6
87	ENST00000262487	ISM1	chr20:13202419-13281298	-16.7	323-375	2176-2228	UTR3	-280.7			87	ENST00000317620	PROM2	chr2:95940202-95957051	-22.1	218-268	792-842	CDS	-247.4
88	ENST00000393274	DENND2C	chr1:115125472-115212656	-16.3	233-286	3067-3120	CDS	-639			88	ENST00000289429	CD1A	chr1:158223928-158228059	-16.9	254-305	1832-1883	UTR3	-246.9
89	ENST00000399899	CLDN8	chr21:31586325-31588391	-16.3	426-483	584-641	CDS	-364.8			89	ENST00000422538	ENDOU	chr12:48103529-48119319	-12.4	413-460	19906	UTR5	-245.2
90	ENST00000301395	GGT6	chr17:4460223-4463876	-16.3	115-164	205-254	CDS	-170.6			90	ENST00000380149	ALOXE3	chr17:7999219-8021807	-20.1	143-192	1792-1841	CDS	-244.3
91	ENST00000335987	OVOL1	chr11:65554494-65564690	-16.2	40-88	1707-1755	UTR3	-228.5			91	ENST00000338523	SNX10	chr7:26331544-26413945	-8.6	513-560	1237-1284	UTR3	-243.8
92	ENST00000391967	LAD1	chr1:201349967-201368736	-16.2	252-308	421-477	CDS	-204.5			92	ENST00000300113	CHP2	chr16:23765949-23770272	-17.2	225-284	2098-2157	UTR3	-240.8
93	ENST00000311852	MMP14	chr14:23305767-23316970	-16.2	278-325	2907-2954	UTR3	-138			93	ENST00000271153	CYP4B1	chr1:47264719-47285085	-15.3	161-208	738-785	CDS	-239.7
94	ENST00000394216	KCNK7	chr11:65360327-65363467	-16.2	236-287	1501-1552	UTR3	-99.6			94	ENST00000263182	BBOX1	chr11:27062510-27149354	-24.2	520-575	1037-1092	CDS	-232.3
95	ENST00000393997	ELMO3	chr16:67233015-67237932	-16.2	284-331	816-863	CDS	-75.4			95	ENST00000319098	PSAPL1	chr4:7432023-7436700	-16	12055	2281-2333	UTR3	-230
96	ENST00000375471	PADI1	chr1:17531622-17572500	-16.1	274-327	367-420	CDS	-262.6			96	ENST00000392957	EPHB6	chr7:142552793-142568847	-16.9	276-323	2785-2832	CDS	-228.6
97	ENST00000551171	RDH12	chr14:68168604-68201169	-16.1	329-380	1149-1200	CDS	-174.6			97	ENST00000335987	OVOL1	chr11:65554494-65564690	-16.2	40-88	1707-1755	UTR3	-228.5
98	ENST00000457326	CAPNS2	chr16:55600585-55601599	-16.1	367-423	184-240	CDS	-117.3			98	ENST00000269394	ZNF750	chr17:80787312-80798454	-18.2	274-335	43-104	UTR5	-227.7
99	ENST00000320567	C1orf172	chr1:27276054-27286897	-16.1	225-279	545-599	CDS	-53.1			99	ENST00000328041	SLC24A3	chr20:19193291-19703581	-17.6	369-416	1692-1739	CDS	-225.4
100	ENST00000370924	PTGER3	chr1:71472315-71513491	-16	493-540	2215-2262	UTR3	-768.8			100	ENST00000370325	GABRE	chrX:151121598-151143151	-12.2	259-306	618-665	CDS	-224.4
101	ENST00000358487	FGFR2	chr10:123237856-123357598	-16	360-409	1712-1761	CDS	-387.2			101	ENST00000573514	CCDC64B	chr16:3077686-3083003	-26	242-295	3268-3321	UTR3	-220.5
102	ENST00000588982	ZBTB7C	chr18:45553045-45691937	-16	139-191	1874-1926	CDS	-375.7			102	ENST00000328945	SDR42E1	chr16:82031222-82045093	-17.1	502-563	1864-1925	UTR3	-219.3
103	ENST00000319098	PSAPL1	chr4:7432023-7436700	-16	12055	2281-2333	UTR3	-230			103	ENST00000301607	EVPL	chr17:74002927-74023533	-15.4	320-369	3471-3520	CDS	-216.8
104	ENST00000217289	FERMT1	chr20:6055493-6104191	-15.9	156-203	5028-5075	UTR3	-455.7			104	ENST00000260843	GPR87	chr3:151011892-151034740	-11.8	325-374	1058-1107	CDS	-209.8
105	ENST00000244728	COL21A1	chr6:55921389-56112544	-15.8	423-472	1586-1635	CDS	-461.5			105	ENST00000391967	LAD1	chr1:201349967-201368736	-16.2	252-308	421-477	CDS	-204.5
106	ENST00000440783	GPT2	chr16:46918748-46965200	-15.8	235-286	2261-2312	UTR3	-343.8			106	ENST00000297265	CHMP4C	chr8:82644670-82671750	-20.2	258-306	407-455	CDS	-201.1
107	ENST00000345382	BNC1	chr15:83924656-83953466	-15.7	427-474	1451-1498	CDS	-533.2			107	ENST00000275815	EPHA1	chr7:143088206-143105985	-24.7	540-592	3191-3243	UTR3	-199.6
108	ENST00000505790	IRX4	chr5:1877563-1887332	-15.7	139-189	943-993	CDS	-155.9			108	ENST00000539839	FZD10	chr12:130647005-130650285	-26.8	372-422	3013-3063	UTR3	-198.3
109	ENST00000543823	SYTL1	chr1:27671365-27680421	-15.7	534-585	351-402	UTR5	-138.6			109	ENST00000244360	RNF39	chr6:30038044-30043664	-26.6	12055	484-535	CDS	-196.3
110	ENST00000432792	TMEM125	chr1:43735697-43739673	-15.5	590-629	1426-1479	UTR3	-64.5			110	ENST00000268933	EPN3	chr17:48609905-48621111	-17.2	223-271	2845-2893	UTR3	-196.2
111	ENST00000301607	EVPL	chr17:74002927-74023533	-15.4	320-369	3471-3520	CDS	-216.8			111	ENST00000436615	RAPGEFL1	chr17:38334243-38351906	-12.4	145-192	2225-2272	UTR3	-195.1
112	ENST00000355594	ANKRD35	chr1:145549231-145568526	-15.4	247-294	3167-3214	UTR3	-179.7			112	ENST00000330553	KRT79	chr12:53215232-53228079	-28.4	369-419	1508-1558	CDS	-191.2
113	ENST00000372394	ASS1	chr9:133320350-133376661	-15.4	325-376	394-445	UTR5	-170.1			113	ENST00000409840	SERPINE2	chr2:224839871-224896195	-13	402-454	2008-2060	UTR3	-190.9
114	ENST00000271153	CYP4B1	chr1:47264719-47285085	-15.3	161-208	738-785	CDS	-239.7			114	ENST00000375315	C9orf3	chr9:97522067-97849440	-18.5	522-576	442-496	CDS	-189.8
115	ENST00000574161	GCOM1	chr15:57884115-57977560	-15.3	550-600	1309-1359	CDS	-186.1			115	ENST00000574161	GCOM1	chr15:57884115-57977560	-15.3	550-600	1309-1359	CDS	-186.1
116	ENST00000337532	MPP7	chr10:28339923-28569071	-15.2	376-423	2054-2101	UTR3	-639.4			116	ENST00000358777	CEACAM19	chr19:45174725-45187631	-18.6	12420	962-1009	CDS	-185.2
117	ENST00000367748	IL20RA	chr6:137321109-137366298	-15.1	324-379	2131-2186	UTR3	-378.1			117	ENST00000397272	PLA2G4F	chr15:42433333-42448839	-12.9	357-407	2838-2888	UTR3	-181.2
118	ENST00000278601	C11orf52	chr11:111789602-111797596	-15.1	349-397	48-96	UTR5	-96			118	ENST00000355594	ANKRD35	chr1:145549231-145568526	-15.4	247-294	3167-3214	UTR3	-179.7
119	ENST00000404260	MAST4	chr5:65892177-66465423	-15	139-186	6078-6125	CDS	-847.4			119	ENST00000374900	FAAH2	chrX:57313140-57515629	-14.2	523-573	704-754	CDS	-179.3
120	ENST00000303694	CHST11	chr12:104850752-105155792	-15	231-285	3617-3671	UTR3	-513.5			120	ENST00000602346	TP53AIP1	chr11:128805273-128812822	-14.8	597-629	2087-2135	UTR3	-177.8
121	ENST00000421351	PERP	chr6:138409643-138428648	-15	241-288	2281-2328	UTR3	-422.8			121	ENST00000220420	TGM5	chr15:43524794-43559055	-11.3	276-329	1982-2035	CDS	-176.5
122	ENST00000284382	CERS3	chr15:100940601-101084925	-15	217-274	1934-1991	UTR3	-416.7			122	ENST00000528626	TMPRSS13	chr11:117771359-117800096	-12.6	39-88	1809-1858	UTR3	-176.3
123	ENST00000200181	ITGB4	chr17:73717517-73753899	-15	289-338	5308-5357	CDS	-302.1			123	ENST00000394571	PNPLA1	chr6:36238238-36276372	-15	207-254	1537-1584	CDS	-176.2
124	ENST00000394571	PNPLA1	chr6:36238238-36276372	-15	207-254	1537-1584	CDS	-176.2			124	ENST00000318962	ALS2CL	chr3:46710680-46735191	-12.2	142-191	1793-1842	CDS	-175.7
125	ENST00000345988	PPL	chr16:4932509-4987136	-14.9	330-382	1064-1116	CDS	-412.2			125	ENST00000551171	RDH12	chr14:68168604-68201169	-16.1	329-380	1149-1200	CDS	-174.6
126	ENST00000305249	TACR1	chr2:75273591-75426826	-14.9	494-552	1140-1198	CDS	-375.3			126	ENST00000271450	FCGR2A	chr1:161475221-161489358	-10.5	254-303	1236-1285	UTR3	-172.6
127	ENST00000254051	TNS4	chr17:38632081-38657849	-14.8	227-278	1136-1187	CDS	-328.9			127	ENST00000301395	GGT6	chr17:4460223-4463876	-16.3	115-164	205-254	CDS	-170.6
128	ENST00000602346	TP53AIP1	chr11:128805273-128812822	-14.8	597-629	2087-2135	UTR3	-177.8			128	ENST00000372394	ASS1	chr9:133320350-133376661	-15.4	325-376	394-445	UTR5	-170.1
129	ENST00000380554	AKR1C3	chr10:5135986-5149878	-14.8	427-474	637-684	UTR5,start_codon	-159			129	ENST00000418234	PPP1R13L	chr19:45882897-45909607	-14.7	245-292	1596-1643	CDS	-166.8
130	ENST00000418234	PPP1R13L	chr19:45882897-45909607	-14.7	245-292	1596-1643	CDS	-166.8			130	ENST00000605938	ATG9B	chr7:150709336-150721586	-18.3	230-278	3397-3445	UTR3	-166.7
131	ENST00000392550	LLGL2	chr17:73521821-73571288	-14.6	319-366	2554-2601	CDS	-124.6			131	ENST00000371225	TACSTD2	chr1:59041100-59043166	-16.9	278-329	196-247	UTR5	-165.3
132	ENST00000368408	EFNA3	chr1:155051349-155060014	-14.6	255-306	497-548	CDS	-64.8			132	ENST00000410009	CD207	chr2:71057348-71062952	-17.6	369-418	764-813	CDS	-160.5
133	ENST00000448943	TWIST2	chr2:239756674-239795893	-14.6	141-191	1124-1174	UTR3	-62.7			133	ENST00000380554	AKR1C3	chr10:5135986-5149878	-14.8	427-474	637-684	UTR5,start_codon	-159
134	ENST00000260264	POU2F3	chr11:120107350-120190653	-14.5	281-330	1181-1230	CDS	-154.2			134	ENST00000505790	IRX4	chr5:1877563-1887332	-15.7	139-189	943-993	CDS	-155.9
135	ENST00000527815	AIM1L	chr1:26648351-26670576	-14.4	12420	2487-2523	UTR3	-126.6			135	ENST00000314124	TMEM40	chr3:12775025-12801038	-20.6	323-376	370-423	CDS	-155.5
136	ENST00000449963	AC010891.2	chrY:9650925-9655122	-14.4	167-214	253-300	ncRNA	-59.4			136	ENST00000260264	POU2F3	chr11:120107350-120190653	-14.5	281-330	1181-1230	CDS	-154.2
137	ENST00000535157	SCEL	chr13:78109810-78219394	-14.3	219-268	1750-1799	CDS	-381.1			137	ENST00000373366	GJB3	chr1:35246791-35251965	-22.2	30-79	687-736	CDS	-150.6
138	ENST00000368222	CRABP2	chr1:156669399-156675393	-14.3	310-357	251-298	CDS	-81.6			138	ENST00000209718	KRT23	chr17:39078949-39093672	-19.2	425-490	1640-1705	CDS,stop_codon	-143.5
139	ENST00000374900	FAAH2	chrX:57313140-57515629	-14.2	523-573	704-754	CDS	-179.3			139	ENST00000343070	SCNN1B	chr16:23313592-23392620	-14.2	251-306	2156-2211	UTR3	-141.7
140	ENST00000343070	SCNN1B	chr16:23313592-23392620	-14.2	251-306	2156-2211	UTR3	-141.7			140	ENST00000553456	EMX2	chr10:119301956-119309056	-12.9	229-280	1458-1509	CDS	-140.4
141	ENST00000278780	OVOL2	chr20:18004797-18038521	-14.2	428-475	1199-1246	UTR3	-81			141	ENST00000543823	SYTL1	chr1:27671365-27680421	-15.7	534-585	351-402	UTR5	-138.6
142	ENST00000226247	FOXN1	chr17:26850960-26865914	-14.1	325-374	1275-1324	CDS	-268.2			142	ENST00000311852	MMP14	chr14:23305767-23316970	-16.2	278-325	2907-2954	UTR3	-138
143	ENST00000228027	DGAT2	chr11:75479778-75512579	-14	275-333	2258-2316	UTR3	-123.3			143	ENST00000589373	KLC3	chr19:45836693-45853645	-12.7	222-269	981-1028	CDS	-136
144	ENST00000375819	LY6G6C	chr6:31686426-31689622	-14	42397	708-755	UTR3	-65.4			144	ENST00000252245	KRT75	chr12:52817855-52828309	-11.8	144-192	1819-1867	CDS	-132.5
145	ENST00000262094	RAB27B	chr18:52495431-52562747	-13.9	600-629	5734-5783	UTR3	-862.1			145	ENST00000527815	AIM1L	chr1:26648351-26670576	-14.4	12420	2487-2523	UTR3	-126.6
146	ENST00000390654	COL23A1	chr5:177664620-178017556	-13.9	242-291	1271-1320	CDS	-108.5			146	ENST00000331563	PKP3	chr11:394218-404908	-16.8	237-287	2660-2710	UTR3	-126.5
147	ENST00000313234	KRT80	chr12:52562781-52585784	-13.8	591-629	2509-2559	UTR3	-266.4			147	ENST00000392550	LLGL2	chr17:73521821-73571288	-14.6	319-366	2554-2601	CDS	-124.6
148	ENST00000454295	MARVELD2	chr5:68710955-68740157	-13.7	378-426	3033-3081	UTR3	-387			148	ENST00000228027	DGAT2	chr11:75479778-75512579	-14	275-333	2258-2316	UTR3	-123.3
149	ENST00000295294	BNIPL	chr1:151009092-151020062	-13.6	287-334	1783-1830	UTR3	-102.1			149	ENST00000457326	CAPNS2	chr16:55600585-55601599	-16.1	367-423	184-240	CDS	-117.3
150	ENST00000409359	ARHGEF4	chr2:131595029-131704803	-13.5	323-372	4037-4086	CDS	-308.4			150	ENST00000409642	LYPD6B	chr2:149894982-150071776	-11.2	285-338	454-507	CDS	-117.3
151	ENST00000281030	THRSP	chr11:77774908-77779397	-13.3	139-190	377-428	CDS	-89.5			151	ENST00000307486	C2orf54	chr2:241825467-241831455	-10.2	311-358	730-777	CDS	-114.8
152	ENST00000376503	SLC15A1	chr13:99336056-99404908	-13.2	228-281	1850-1903	CDS	-344.6			152	ENST00000296839	FOXQ1	chr6:1312676-1314992	-18.2	330-382	761-813	CDS	-114.5
153	ENST00000221730	EPHX3	chr19:15337731-15343243	-13.1	229-284	842-897	CDS	-87.7			153	ENST00000390654	COL23A1	chr5:177664620-178017556	-13.9	242-291	1271-1320	CDS	-108.5
154	ENST00000317508	PRSS8	chr16:31142757-31147083	-13.1	231-282	987-1038	CDS	-79.2			154	ENST00000525380	SCGB2A2	chr11:62037631-62039543	-10.5	539-592	221-274	CDS	-105.6
155	ENST00000297439	DEFB1	chr8:6728098-6735544	-13.1	157-204	13150	UTR5	-28.8			155	ENST00000344416	ANXA8	chr10:48255308-48271363	-12.2	201-254	512-565	CDS	-104.7
156	ENST00000409840	SERPINE2	chr2:224839871-224896195	-13	402-454	2008-2060	UTR3	-190.9			156	ENST00000265627	PON3	chr7:94989257-95025673	-12	206-257	146-197	CDS	-103.4
157	ENST00000397272	PLA2G4F	chr15:42433333-42448839	-12.9	357-407	2838-2888	UTR3	-181.2			157	ENST00000295294	BNIPL	chr1:151009092-151020062	-13.6	287-334	1783-1830	UTR3	-102.1
158	ENST00000553456	EMX2	chr10:119301956-119309056	-12.9	229-280	1458-1509	CDS	-140.4			158	ENST00000314014	C12orf54	chr12:48876287-48890295	-18.1	528-590	13-75	UTR5	-101.9
159	ENST00000433979	PIK3C2G	chr12:18414475-18801348	-12.8	491-538	1079-1126	CDS	-611			159	ENST00000394216	KCNK7	chr11:65360327-65363467	-16.2	236-287	1501-1552	UTR3	-99.6
160	ENST00000264218	NMU	chr4:56461399-56502465	-12.8	354-408	584-638	CDS,stop_codon	-77.6			160	ENST00000278601	C11orf52	chr11:111789602-111797596	-15.1	349-397	48-96	UTR5	-96
161	ENST00000155926	TRIB2	chr2:12857016-12882860	-12.7	507-571	4306-4370	UTR3	-354.1			161	ENST00000269703	CYP4F22	chr19:15619305-15663128	-16.9	278-334	42-98	UTR5	-94.4
162	ENST00000367021	IRF6	chr1:209959037-209979389	-12.7	475-528	3396-3449	UTR3	-264.3			162	ENST00000250055	SOX15	chr17:7491497-7493488	-19	523-586	16803	UTR5	-91.4
163	ENST00000589373	KLC3	chr19:45836693-45853645	-12.7	222-269	981-1028	CDS	-136			163	ENST00000281030	THRSP	chr11:77774908-77779397	-13.3	139-190	377-428	CDS	-89.5
164	ENST00000528626	TMPRSS13	chr11:117771359-117800096	-12.6	39-88	1809-1858	UTR3	-176.3			164	ENST00000221730	EPHX3	chr19:15337731-15343243	-13.1	229-284	842-897	CDS	-87.7
165	ENST00000422538	ENDOU	chr12:48103529-48119319	-12.4	413-460	19906	UTR5	-245.2			165	ENST00000590923	AP1M2	chr19:10683348-10697991	-11.9	144-191	270-317	CDS	-87
166	ENST00000436615	RAPGEFL1	chr17:38334243-38351906	-12.4	145-192	2225-2272	UTR3	-195.1			166	ENST00000543753	KRTCAP3	chr2:27665234-27669348	-11.2	324-377	813-866	UTR3	-86.6
167	ENST00000397299	JMJD7	chr15:42120284-42129779	-12.3	221-271	501-551	CDS	-71.4			167	ENST00000405535	TMEM79	chr1:156254071-156262234	-11.8	226-275	412-461	CDS	-85.1
168	ENST00000370325	GABRE	chrX:151121598-151143151	-12.2	259-306	618-665	CDS	-224.4			168	ENST00000368222	CRABP2	chr1:156669399-156675393	-14.3	310-357	251-298	CDS	-81.6
169	ENST00000318962	ALS2CL	chr3:46710680-46735191	-12.2	142-191	1793-1842	CDS	-175.7			169	ENST00000278780	OVOL2	chr20:18004797-18038521	-14.2	428-475	1199-1246	UTR3	-81
170	ENST00000344416	ANXA8	chr10:48255308-48271363	-12.2	201-254	512-565	CDS	-104.7			170	ENST00000317508	PRSS8	chr16:31142757-31147083	-13.1	231-282	987-1038	CDS	-79.2
171	ENST00000265627	PON3	chr7:94989257-95025673	-12	206-257	146-197	CDS	-103.4			171	ENST00000264218	NMU	chr4:56461399-56502465	-12.8	354-408	584-638	CDS,stop_codon	-77.6
172	ENST00000590923	AP1M2	chr19:10683348-10697991	-11.9	144-191	270-317	CDS	-87			172	ENST00000220507	RHOV	chr15:41164413-41166487	-11.7	351-398	595-642	CDS	-76.7
173	ENST00000308796	MUCL1	chr12:55248322-55252177	-11.9	30-80	42-92	UTR5,start_codon	-60.2			173	ENST00000296370	S100P	chr4:6694797-6698896	-21.4	230-283	1169-1222	UTR3	-75.8
174	ENST00000260843	GPR87	chr3:151011892-151034740	-11.8	325-374	1058-1107	CDS	-209.8			174	ENST00000323090	SULT2B1	chr19:49078798-49102682	-20.5	139-192	879-932	CDS	-75.8
175	ENST00000252245	KRT75	chr12:52817855-52828309	-11.8	144-192	1819-1867	CDS	-132.5			175	ENST00000393997	ELMO3	chr16:67233015-67237932	-16.2	284-331	816-863	CDS	-75.4
176	ENST00000405535	TMEM79	chr1:156254071-156262234	-11.8	226-275	412-461	CDS	-85.1			176	ENST00000397299	JMJD7	chr15:42120284-42129779	-12.3	221-271	501-551	CDS	-71.4
177	ENST00000220507	RHOV	chr15:41164413-41166487	-11.7	351-398	595-642	CDS	-76.7			177	ENST00000456047	DCD	chr12:55038415-55042277	-11.4	322-379	330-387	CDS	-70.3
178	ENST00000456047	DCD	chr12:55038415-55042277	-11.4	322-379	330-387	CDS	-70.3			178	ENST00000375819	LY6G6C	chr6:31686426-31689622	-14	42397	708-755	UTR3	-65.4
179	ENST00000220420	TGM5	chr15:43524794-43559055	-11.3	276-329	1982-2035	CDS	-176.5			179	ENST00000368408	EFNA3	chr1:155051349-155060014	-14.6	255-306	497-548	CDS	-64.8
180	ENST00000409642	LYPD6B	chr2:149894982-150071776	-11.2	285-338	454-507	CDS	-117.3			180	ENST00000432792	TMEM125	chr1:43735697-43739673	-15.5	590-629	1426-1479	UTR3	-64.5
181	ENST00000543753	KRTCAP3	chr2:27665234-27669348	-11.2	324-377	813-866	UTR3	-86.6			181	ENST00000250144	MMP28	chr17:34105510-34122711	-11.2	431-480	1025-1074	UTR3	-64.4
182	ENST00000250144	MMP28	chr17:34105510-34122711	-11.2	431-480	1025-1074	UTR3	-64.4			182	ENST00000448943	TWIST2	chr2:239756674-239795893	-14.6	141-191	1124-1174	UTR3	-62.7
183	ENST00000361084	RAB25	chr1:156030952-156040295	-11.1	204-263	646-705	CDS	-58.4			183	ENST00000308796	MUCL1	chr12:55248322-55252177	-11.9	30-80	42-92	UTR5,start_codon	-60.2
184	ENST00000271450	FCGR2A	chr1:161475221-161489358	-10.5	254-303	1236-1285	UTR3	-172.6			184	ENST00000449963	AC010891.2	chrY:9650925-9655122	-14.4	167-214	253-300	ncRNA	-59.4
185	ENST00000525380	SCGB2A2	chr11:62037631-62039543	-10.5	539-592	221-274	CDS	-105.6			185	ENST00000361084	RAB25	chr1:156030952-156040295	-11.1	204-263	646-705	CDS	-58.4
186	ENST00000307486	C2orf54	chr2:241825467-241831455	-10.2	311-358	730-777	CDS	-114.8			186	ENST00000320567	C1orf172	chr1:27276054-27286897	-16.1	225-279	545-599	CDS	-53.1
187	ENST00000392124	YIF1B	chr19:38795756-38800563	-10.2	205-259	1005-1059	CDS	-49.7			187	ENST00000392124	YIF1B	chr19:38795756-38800563	-10.2	205-259	1005-1059	CDS	-49.7
188	ENST00000312134	CST6	chr11:65779313-65780976	-8.8	281-330	481-530	CDS	-8.8			188	ENST00000297439	DEFB1	chr8:6728098-6735544	-13.1	157-204	13150	UTR5	-28.8
189	ENST00000530950	CARD18	chr11:105008449-105010453	-8.7	227-274	288-335	UTR3	-23.8			189	ENST00000530950	CARD18	chr11:105008449-105010453	-8.7	227-274	288-335	UTR3	-23.8
190	ENST00000338523	SNX10	chr7:26331544-26413945	-8.6	513-560	1237-1284	UTR3	-243.8			190	ENST00000244926	SCGB1D2	chr11:62009683-62012280	-8.6	220-271	235-286	CDS	-22
191	ENST00000244926	SCGB1D2	chr11:62009683-62012280	-8.6	220-271	235-286	CDS	-22			191	ENST00000259631	CCL27	chr9:34661894-34662689	-8	203-250	407-446	UTR3	-15
192	ENST00000259631	CCL27	chr9:34661894-34662689	-8	203-250	407-446	UTR3	-15			192	ENST00000312134	CST6	chr11:65779313-65780976	-8.8	281-330	481-530	CDS	-8.8
193	ENST00000301263	LY6D	chr8:143866297-143868008	-7	216-267	591-642	UTR3	-10.1			193	ENST00000301263	LY6D	chr8:143866297-143868008	-7	216-267	591-642	UTR3	-10.1

## Sheet: MMPM
Table S14 Partial list of mRNAs interacting with ENST00000565315 (RP11-532F12.5), sorted by MinEnergy											Table S14 Partial list of mRNAs interacting with ENST00000565315 (RP11-532F12.5), sorted by SumEnergy
				MinEnergy											MinEnergy
Rank	Ensemble ID	Name	Position (hg19)	MinEnergy	BS(query)	BS(target)	location	SumEnergy			Rank	Ensemble ID	Name	Position (hg19)	MinEnergy	BS(query)	BS(target)	location	SumEnergy
1	ENST00000433108	MIR205HG	chr1:209602166-209605890	-18.5	139-189	2913-2963	ncRNA	-264.5			1	ENST00000369707	GSTO2	chr10:106034921-106064703	-17.4	158-205	1414-1461	UTR3	-521.5
2	ENST00000369707	GSTO2	chr10:106034921-106064703	-17.4	158-205	1414-1461	UTR3	-521.5			2	ENST00000284382	CERS3	chr15:100940601-101084925	-15	217-274	1934-1991	UTR3	-416.7
3	ENST00000301395	GGT6	chr17:4460223-4463876	-16.3	115-164	205-254	CDS	-170.6			3	ENST00000433108	MIR205HG	chr1:209602166-209605890	-18.5	139-189	2913-2963	ncRNA	-264.5
4	ENST00000457326	CAPNS2	chr16:55600585-55601599	-16.1	367-423	184-240	CDS	-117.3			4	ENST00000602346	TP53AIP1	chr11:128805273-128812822	-14.8	597-629	2087-2135	UTR3	-177.8
5	ENST00000505790	IRX4	chr5:1877563-1887332	-15.7	139-189	943-993	CDS	-155.9			5	ENST00000301395	GGT6	chr17:4460223-4463876	-16.3	115-164	205-254	CDS	-170.6
6	ENST00000284382	CERS3	chr15:100940601-101084925	-15	217-274	1934-1991	UTR3	-416.7			6	ENST00000505790	IRX4	chr5:1877563-1887332	-15.7	139-189	943-993	CDS	-155.9
7	ENST00000602346	TP53AIP1	chr11:128805273-128812822	-14.8	597-629	2087-2135	UTR3	-177.8			7	ENST00000457326	CAPNS2	chr16:55600585-55601599	-16.1	367-423	184-240	CDS	-117.3
